# Supplementary material for: Facile Fabrication of Highly Efficient Chitosan-Based Multifunctional Coating for Cotton Fabrics with Excellent Flame-Retardant and Antibacterial Properties
Source: MDPI journal article supplement (doi:10.3390/polym16101409), 2024-05-16
Supplement: s1 [file s1]

# Facile fabrication of highly efficient chitosan-based multifunctional coating for cotton fabrics with excellent flame retardant and antibacterial properties

Yuan-Yuan Huang , Li-Ping Zhang , Xing Cao , Xin-Yu Tian , Yan-Peng Ni \*

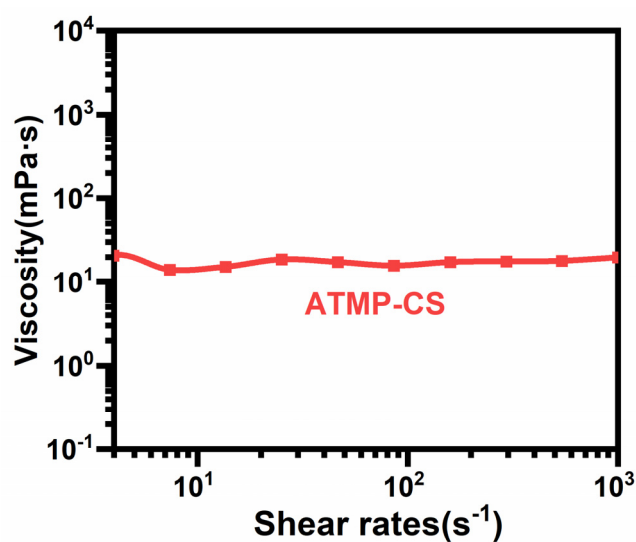

Figure S1. Viscosity curve of ATMP solution with shear rate

Table S1. TGA and DTG dates of cotton and ATMP-CS@Cx fabrics in nitrogen atmosphere.

| Samples       | Nitrogen             |                        |                                  |                       |
|---------------|----------------------|------------------------|----------------------------------|-----------------------|
|               | $T_{5\%}(\text{°C})$ | $T_{d\max}(\text{°C})$ | $R_{d\max}(\%/^{\circ}\text{C})$ | Residues(700°C, wt.%) |
| Cotton        | 327.4                | 357.4                  | 1.43                             | 6.8                   |
| ATMP-CS@C5.5  | 256.6                | 299.0                  | 0.74                             | 30.2                  |
| ATMP-CS@C8.5  | 254.2                | 294.9                  | 0.68                             | 34.0                  |
| ATMP-CS@C11.5 | 249.7                | 290.1                  | 0.65                             | 34.1                  |

Table S2. TGA and DTG dates of cotton and ATMP-CS@Cx fabrics in air atmosphere.

| Samples       | Air               |                              |                                |                              |                                | Residue<br>(700°C, wt.%) |
|---------------|-------------------|------------------------------|--------------------------------|------------------------------|--------------------------------|--------------------------|
|               | $T_{5\%}$<br>(°C) | $T_{d1 \text{ max}}$<br>(°C) | $R_{d1 \text{ max}}$<br>(%/°C) | $T_{d2 \text{ max}}$<br>(°C) | $R_{d2 \text{ max}}$<br>(%/°C) |                          |
| Cotton        | 309.9             | 338.2                        | 1.37                           | 454.7                        | 0.15                           | 1.3                      |
| ATMP-CS@C5.5  | 255.9             | 298.3                        | 0.77                           | 505.1                        | 0.21                           | 4.4                      |
| ATMP-CS@C8.5  | 257.1             | 293.7                        | 0.72                           | 508.8                        | 0.21                           | 5.7                      |
| ATMP-CS@C11.5 | 247.5             | 285.7                        | 0.64                           | 510.0                        | 0.21                           | 8.5                      |

Table S3. The properties data of the fabric itself

| Samples           | Breaking force(N) |      | Elongation at break(%) |      | Air<br>permeability<br>(L/m <sup>2</sup> ·s) | Whiteness<br>(%) |
|-------------------|-------------------|------|------------------------|------|----------------------------------------------|------------------|
|                   | Warp              | Weft | Warp                   | Weft |                                              |                  |
| Cotton            | 650               | 241  | 15.1                   | 12.7 | 303                                          | 76.7             |
| ATMP-<br>CS@C5.5  | 543               | 243  | 12.0                   | 10.2 | 352                                          | 79.2             |
| ATMP-<br>CS@C8.5  | 498               | 254  | 11.7                   | 8.5  | 309                                          | 78.4             |
| ATMP-<br>CS@C11.5 | 479               | 241  | 7.7                    | 8.1  | 302                                          | 78.3             |
